# Supplementary material for: An Engineered IFNγ-Antibody Fusion Protein with Improved Tumor-Homing Properties
Source: MDPI journal article supplement (doi:10.3390/pharmaceutics15020377), 2023-01-22
Supplement: s1 [file s1]

## Supplementary Material

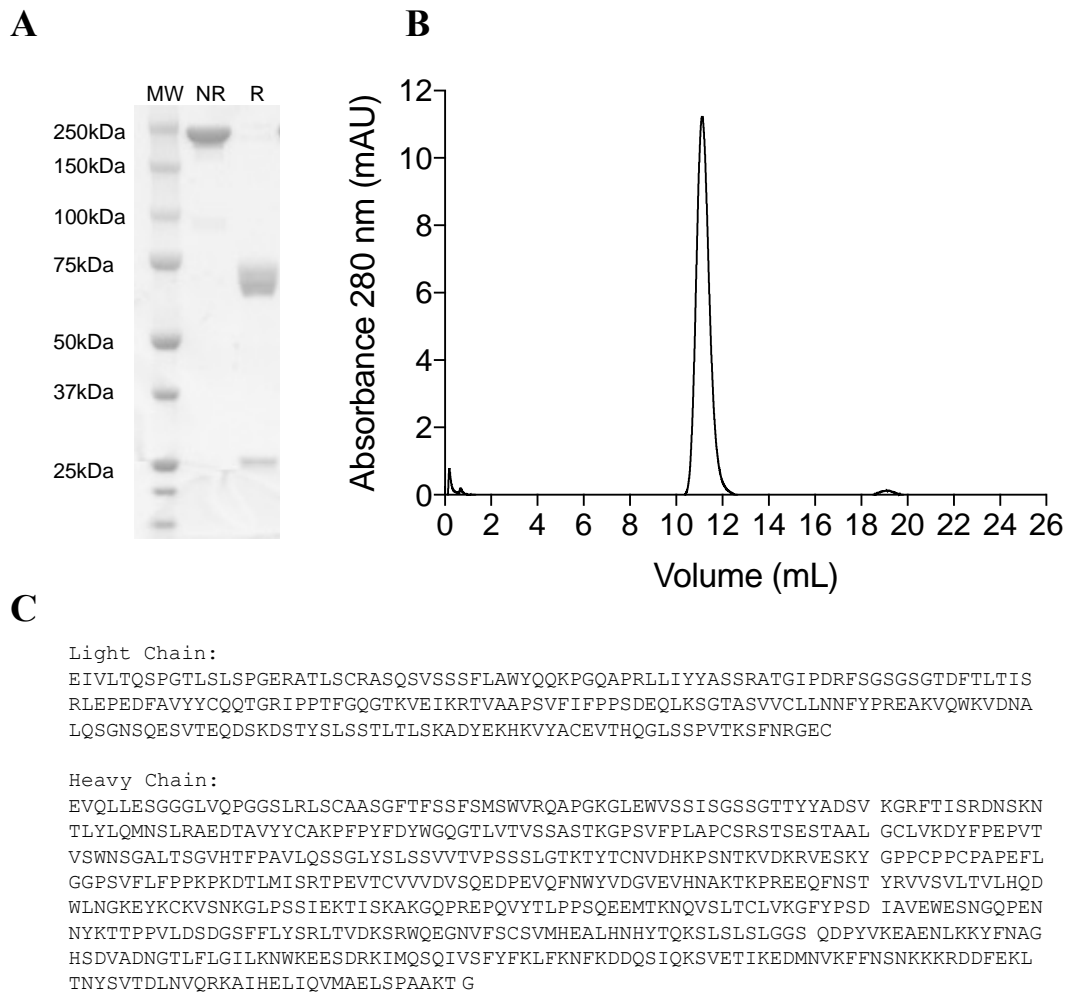

**Figure S1 L19-IFN $\gamma$  TG biochemical characterization and amino acid sequence**

(A) SDS-page, 10% gel in reducing (R) and non-reducing (NR) conditions. (B) Size exclusion chromatography profile. (C) Amino acid sequence.

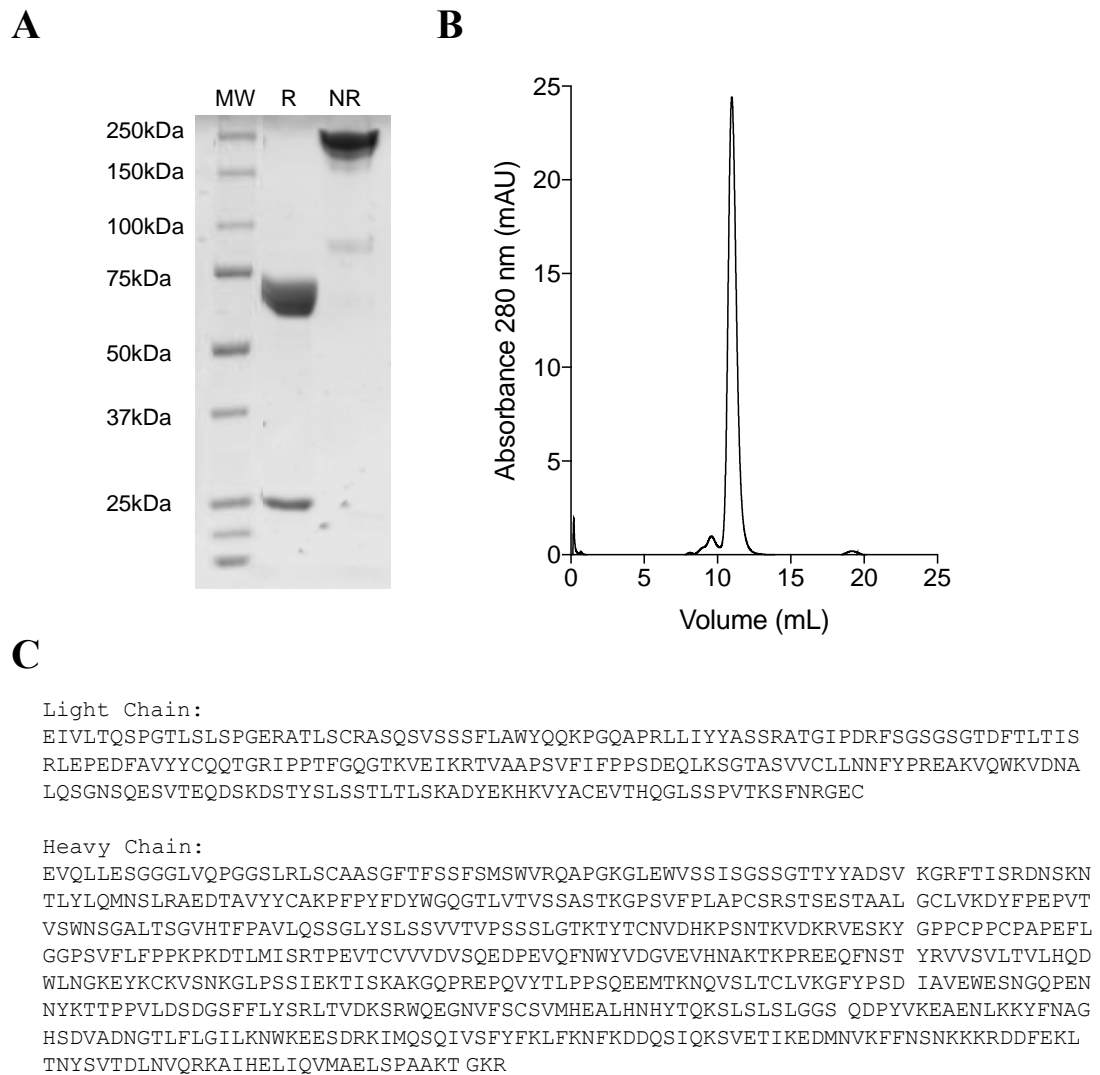

**Figure S2 L19-IFN $\gamma$  KR biochemical characterization and amino acid sequence**  
**(A)** SDS-page, 10% gel in reducing (R) and non-reducing (NR) conditions. **(B)** Size exclusion chromatography profile. **(C)** Amino acid sequence.

Light Chain:

EIVLTQSPGTLSSLSPGERATLSCRASQSVSSSFLAWYQQKPGQAPRLLIYYASSRATGIPDRFSGSGSGTDFTLTIS  
RLEPEDFAVYYCQQTGRIPPTFGQGTKVEIKRTVAAPSVFIFPPSDEQLKSGTASVVCLLNNFYPREAKVQWKVDNA  
LQSGNSQESVTEQDSKDYSLSTLTLSKADYEKHKVYACEVTHQGLSSPVTKSFNRGEC

Heavy Chain:

EVQLLESGGGLVQPGGSLRLSCAASGFTFSSFSMSWVRQAPGKGLEWVSSISGSSGTTYADSV KGRFTISRDN SKN  
TLYLQMNSLRAEDTAVYYCAKPFPPYFDYWGGTLVTVSSASTKGPSVFPLAPCSRSTSESTAAL GCLVKDYFPEPVT  
VSWNSGALTSGVHTFPAVLQSSGLYSLSSVTVPSSSLGKTYTCNVDHKPSNTKVDKRVESKY GPFCPPCPAPEFL  
GGPSVFLFPPKPKDTLMISRTPEVTCVVDVDSQEDPEVQFNWYVDGVEVHNAKTKPREEQFNST YRVVSVLTVLHQD  
WLNKEYKCKVSNKGLPSSIEKTISKAKGQPREPQVYTLPPSQEEMTKNQVSLTCLVKGFYPSD IAVEWESNGQPEN  
NYKTTTPVLDSDGSFFLYSRLTVDKSRWQEGNVFSCSVMHEALHNHYTQKSLSLGLGGS QDPYVKEAENLK KYFNAG  
HSDVADNGTLFLGILKNWKEESDRKIMQSQIVSFYFKLFKNFDDQSIQKSVETIKEDMNVKFFNSNKKKRDDFEKL  
TNYSVTDLNVQRKAIHELIQVMAELSPA AKTGKRG

**Figure S3 L19-IFN $\gamma$  KRG amino acid sequence**

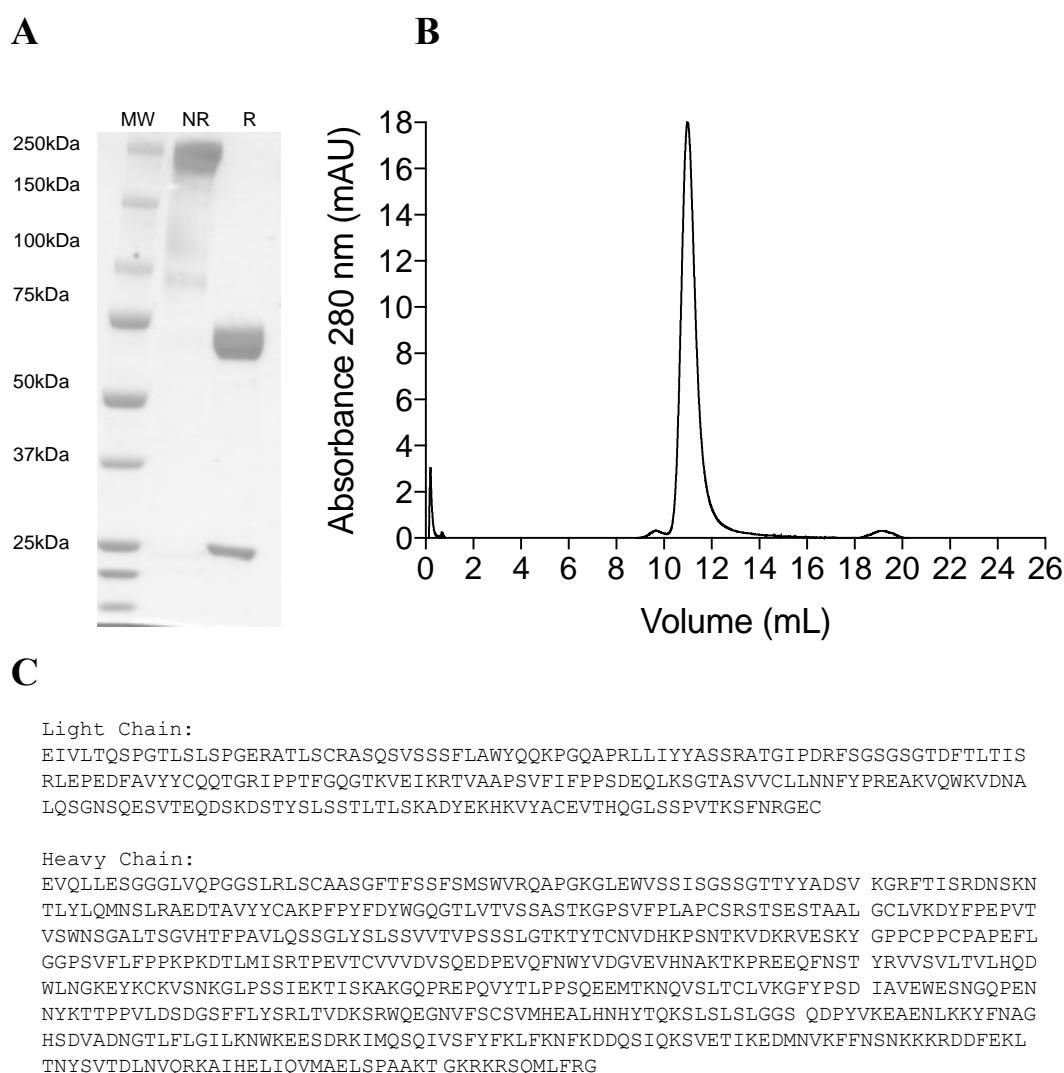

**Figure S4 L19-IFN $\gamma$  WT biochemical characterization and amino acid sequence**  
**(A)** SDS-page, 10% gel in reducing (R) and non-reducing (NR) conditions. **(B)** Size exclusion chromatography profile. **(C)** Amino acid sequence.

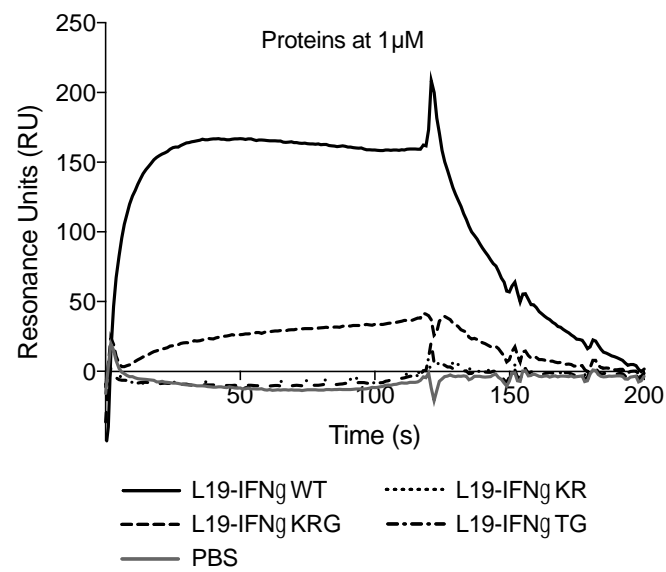

**Figure S5 SPR analysis on IFN $\gamma$ R1 CM5 coated chip**

Proteins at 1  $\mu$ M were analyzed on an IFN $\gamma$ R1 CM5 coated chip.

## A C-terminus sequencing L19-IFNg-KRG

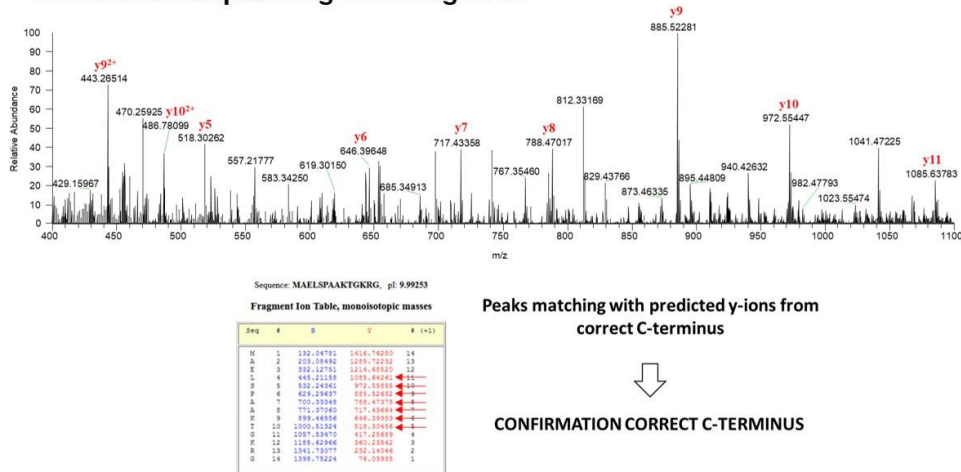

## B C-terminus sequencing L19-IFNg-KR

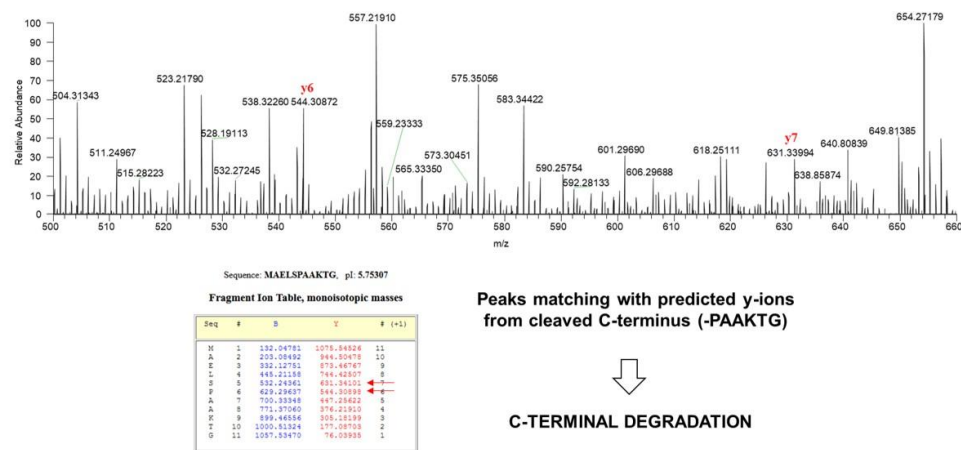

## Figure S6 C-terminus sequence confirmation by Intact Mass Analysis

For L19-IFNg-KRG variant (A), several y-ions from the predicted fragmentation list were detected in the fragmentation spectrum, confirming its identity. For L19-IFNg-KR variant (B), no y-ions from the predicted fragmentation list were detected in the fragmentation spectrum. However, y-ions from the predicted fragmentation list of L19-IFNg-TG variant were identified indicating a C-terminal degradation.

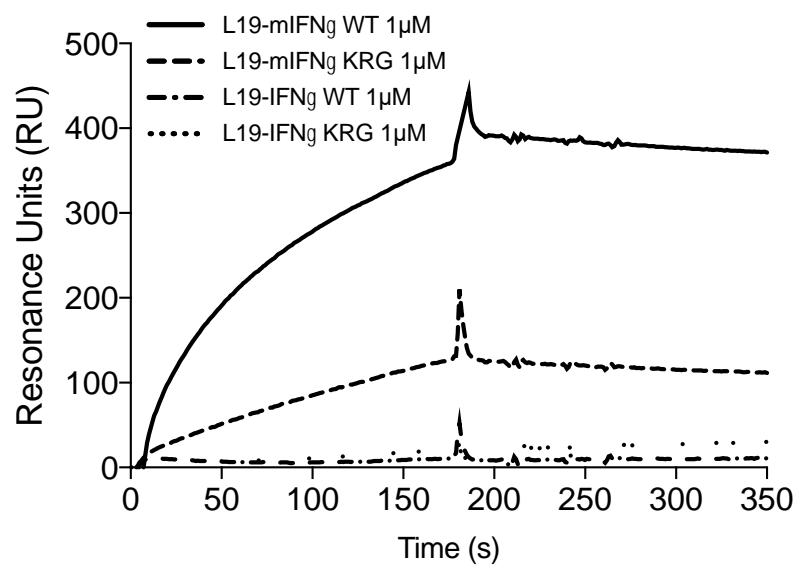

**Figure S7 SPR analysis on mIFN $\gamma$ R1 CM5 coated chip**

Proteins at 1 $\mu$ M were analyzed on a mIFN $\gamma$ R1 CM5 coated chip.

Light Chain:

EIVLTQSPGTLSSLSPGERATLSCRASQSVSSSFLAWYQQKPGQAPRLLIYYASSRATGIPDRFSGSGSGTDFTLTIS  
RLEPEDFAVYYCQQTGRIPPTFGQGTKVEIKRTVAAPSVFIFPPSDEQLKSGTASVVCLLNNFYPREAKVQWKVDNA  
LQSGNSQESVTEQDSKDYSLSTLTLSKADYEKHKVYACEVTHQGLSSPVTKSFNRGEC

Heavy Chain:

EVQLLESQGGGLVQPGGSLRLSCAASGFTFSSFSMSWVRQAPGKGLEWVSSISGSSGTTYADSV KGRFTISRDNSKN  
TLYLQMNSLRAEDTAVYYCAKPPYFDYWGQGTLVTVSSASTKGPSVFPLAPCSRSTSESTAAL GCLVKDYFPEPVT  
VSWNSGALTSGVHTFPAVLQSSGLYSLSSVVPSSSLGKTYTCNVDPKPSNTKVDKRVESKY GPCCPPCPAPEFL  
GGPSVFLFPPKPKDTLMISRTPEVTCVVDVDSQEDPEVQFNWYVDGVEVHNAKTKPREEQFNST YRVVSVLTVLHQD  
WLNGKEYKCKVSNKGLPSSIEKTISKAKGQPREPQVYTLPPSQEEMTKNQVSLTCLVKGFYPSD IAVEWESNGQPEN  
NYKTTTPVLDSDGSFFLYSRLTVDKSRWQEGNVFSCSVMHEALHNHYTQKSLSLGLG GSGGGGSGGGSGGGSGGGG  
HGTVIESLESNNYFNSSGIDVEEKSFLDIWRNWQKDGDMKILQSQIISFYLRLEVLKDNQAISNNISVIESHLI  
TTFSSNSKAKKDAFMSIAKFEVNNPQVQRQAFNELIRVVHQLLPESSLRKRKRG

**Figure S8 L19-mIFN $\gamma$  KRG amino acid sequence**



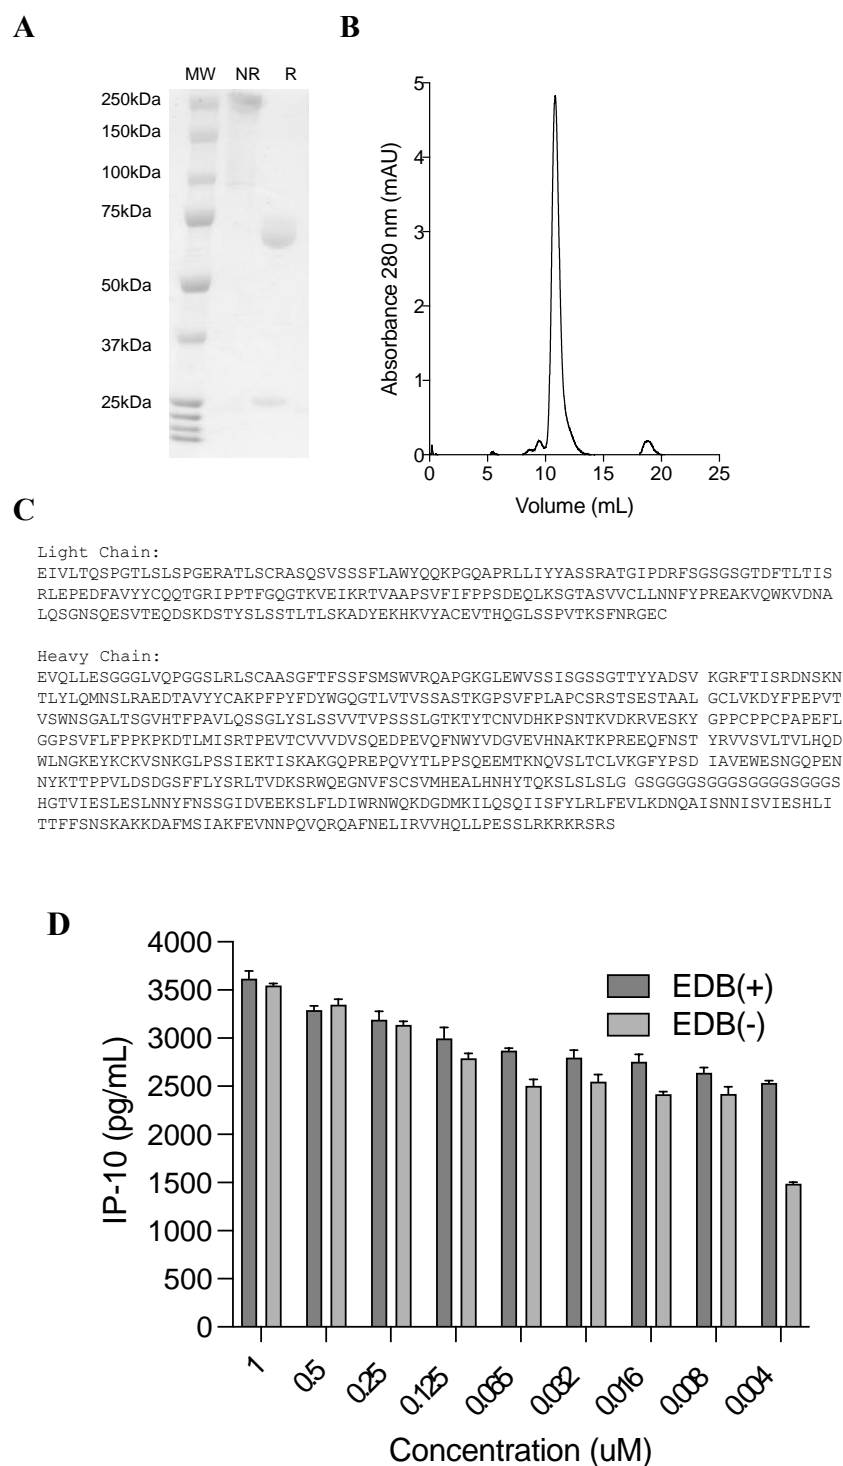

**Figure S9 L19-mIFN $\gamma$  WT biochemical characterization and amino acid sequence**

(A) SDS-page, 10% gel in reducing (R) and non-reducing (NR) conditions. (B) Size exclusion chromatography profile. (C) Amino acid sequence. (D) IP-10

release on TIB-49 cells exposed to titration of L19-mIFN $\gamma$  KRG in coated EDB(+) and non-coated EDB(-) wells.

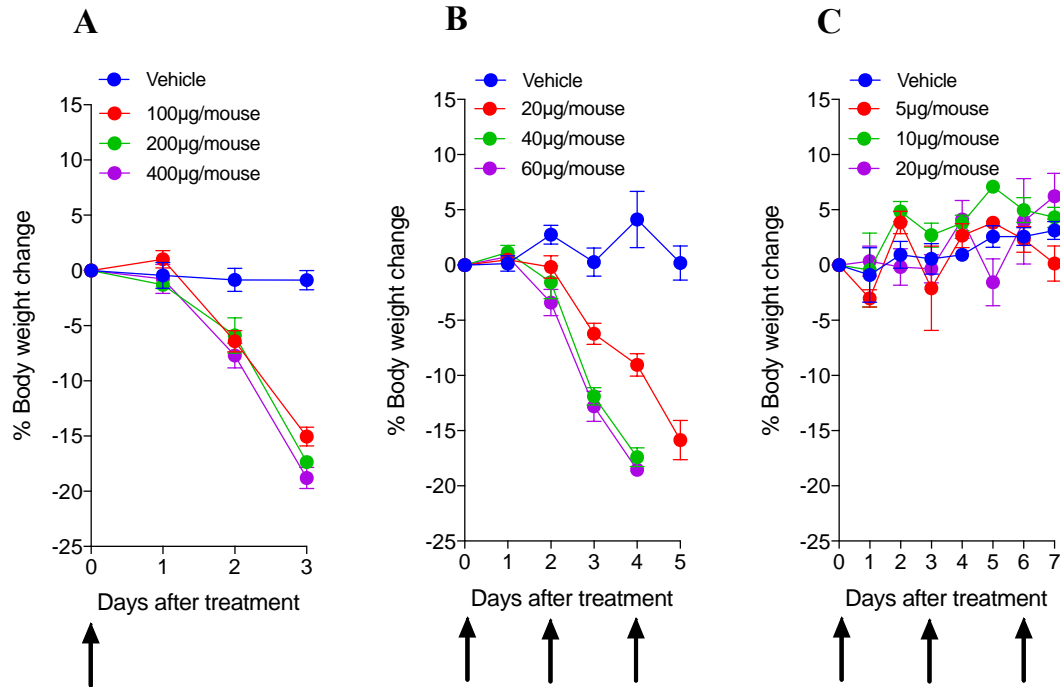

**Figure S10 Dose escalation study**

WEHI-164 tumor bearing mice intravenously injected at the following dose and schedules: (A) 400  $\mu$ g, 200  $\mu$ g, and 100  $\mu$ g with a single injection. (B) 60  $\mu$ g, 40  $\mu$ g and 20  $\mu$ g every 48h. (C) 20  $\mu$ g, 10  $\mu$ g and 5  $\mu$ g every 72h interval. Body weight loss equal or superior to 15% respect to the average body weight was considered as an endpoint. Data represent mean % weight ( $\pm$  SEM), n = 4 mice per group.

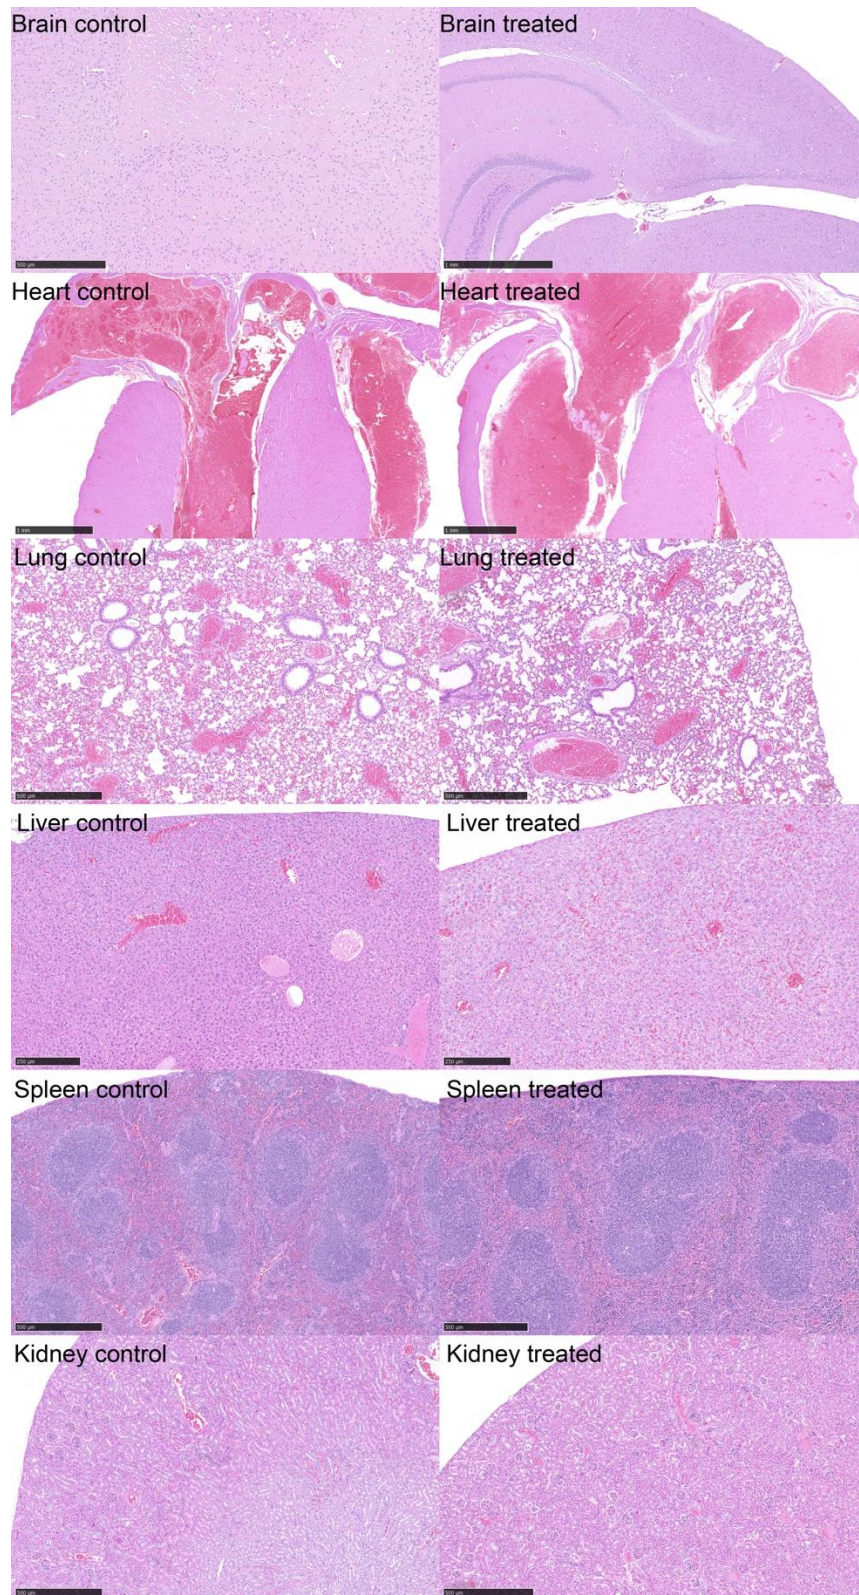

**Figure S11 Histopathological analysis on tumor bearing mice**

H&E staining of organs after L19-mIFN $\gamma$  KRG (right panels) treatment compared to Saline (left panels).

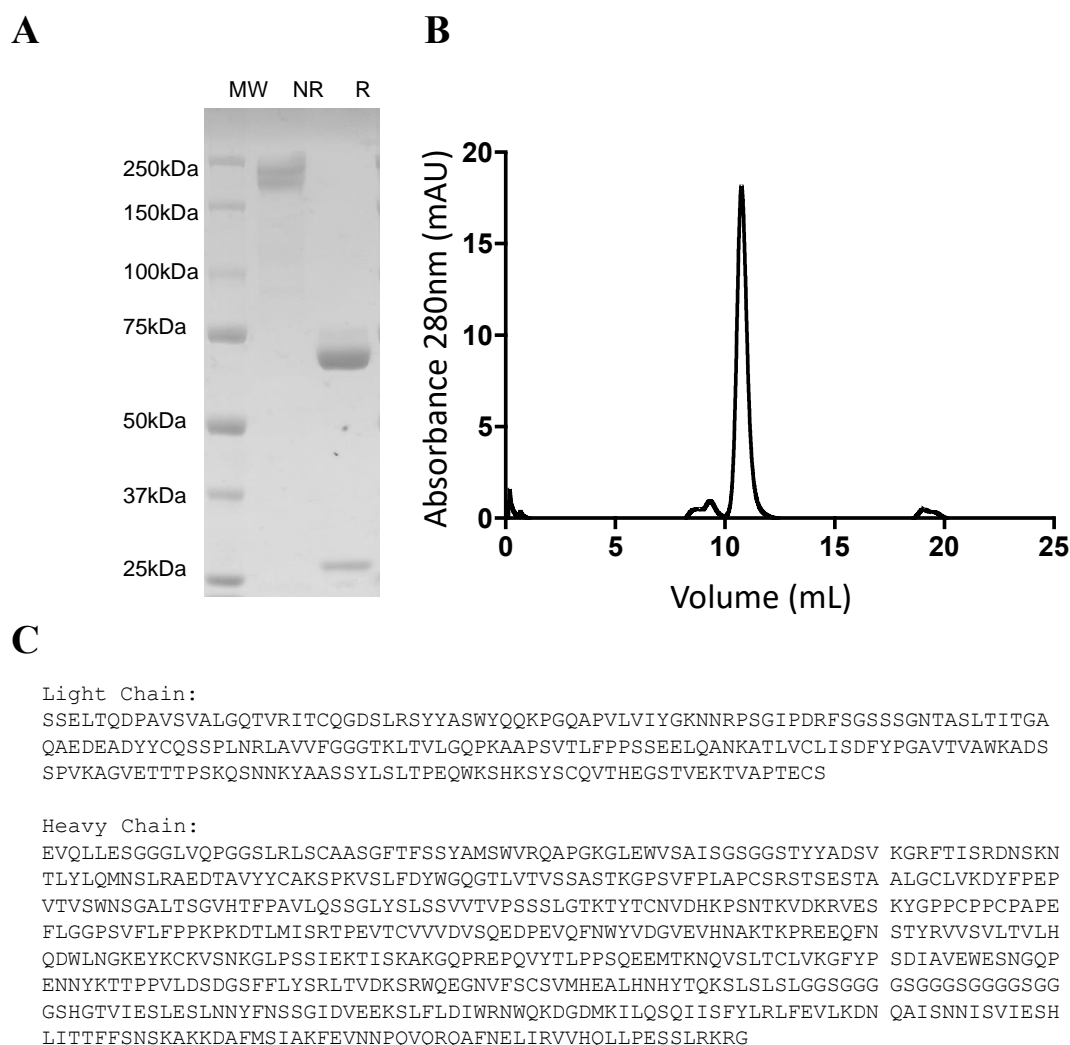

**Figure S12 KSF-mIFNg KRG biochemical characterization and amino acid sequence**

(A) SDS-page, 10% gel in reducing (R) and non-reducing (NR) conditions. (B) Size exclusion chromatography profile. (C) Amino acid sequence.

## Original SDS-Page images

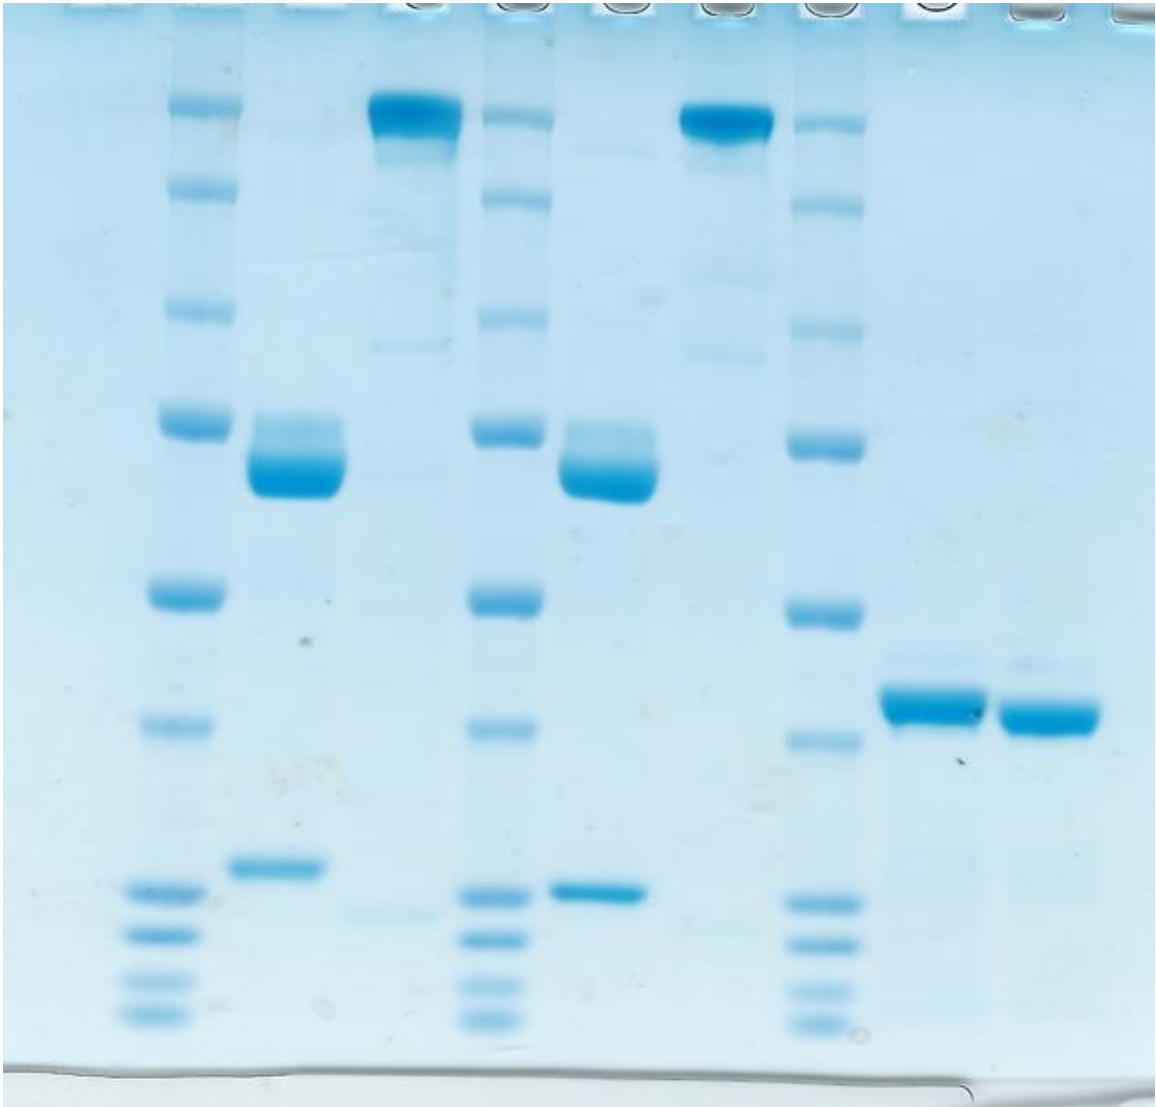

**Original SDS-Page from Figure 1.** Lanes description from left to right, in **bold** the figure present in the manuscript: molecular weight ladder / Protein reducing condition / Protein non-reducing condition / molecular weight ladder / **L19-IFNg KRG Figure 1 reducing condition** / **L19-IFNg KRG Figure 1 non-reducing condition** / molecular weight ladder / Protein reducing condition / Protein non-reducing condition



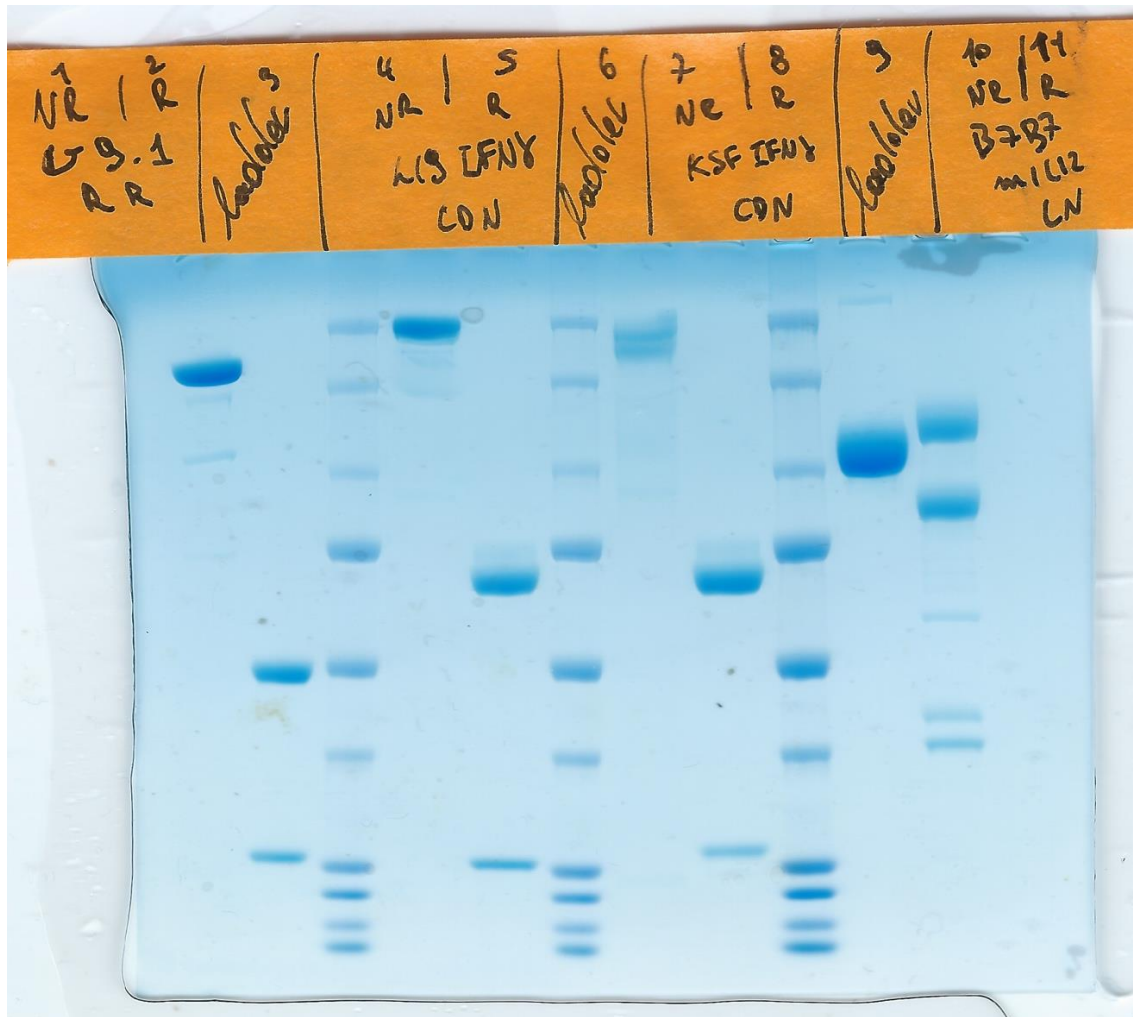

**Original SDS-Page from Figure 3.** lanes description from left to right, in **bold** the figure present in the manuscript: Protein non-reducing condition / Protein reducing condition / molecular weight ladder / **L19-mIFN $\gamma$  KRG Figure 3 non-reducing condition** / **L19-mIFN $\gamma$  KRG Figure 3 reducing condition** / molecular weight ladder / Protein non-reducing condition / Protein reducing condition / molecular weight ladder / Protein non-reducing condition / Protein reducing condition
